# Supplementary material for: Understanding the interdependence of operating parameters in microbial electrosynthesis: a numerical investigation
Source: Royal Society of Chemistry journal article supplement (doi:10.1039/c9cp01288e), 2019-01-01
Supplement: c9cp01288e1.pdf [file c9cp01288e1.pdf]

## **Supplementary Information: Understanding the interdependence of operating parameters in microbial electrosynthesis: a numerical investigation**

Siddharth Gadkari<sup>a,b</sup>, Mobolaji Shemfe<sup>a</sup>, J Annie Modestra<sup>c</sup>, S Venkata Mohan<sup>c</sup>, Jhuma Sadhukhan<sup>a,b</sup>

*<sup>a</sup>Centre for Environment and Sustainability, University of Surrey, Guildford, Surrey GU2 7XH, United Kingdom*

*<sup>b</sup>Department of Chemical and Process Engineering, University of Surrey, Guildford GU2 7XH, United Kingdom*

*<sup>c</sup>Bioengineering and Environmental Sciences Lab, EEFF Department, CSIR-Indian Institute of Chemical Technology (CSIR-IICT), Hyderabad 500 007, India*

---

---

Table S1. Parameter values used in the dynamic simulation (DS) model.

Table S1: Parameter values used in the dynamic model.

| Parameter           | Value                           | Unit                 | Notes/Reference |
|---------------------|---------------------------------|----------------------|-----------------|
| $q_{\max p,a}$      | 1.5                             | day <sup>-1</sup>    | Estimated       |
| $q_{\max s,a}$      | 0.01                            | day <sup>-1</sup>    | Estimated       |
| $q_{\max p,c}$      | 1.3                             | day <sup>-1</sup>    | Estimated       |
| $q_{\max s,c}$      | 0.05                            | day <sup>-1</sup>    | Estimated       |
| $\mu_{\max p,a}$    | 0.2                             | day <sup>-1</sup>    | Estimated       |
| $\mu_{\max s,a}$    | 0.1                             | day <sup>-1</sup>    | Estimated       |
| $\mu_{\max p,c}$    | 0.18                            | day <sup>-1</sup>    | Estimated       |
| $\mu_{\max s,c}$    | 1                               | day <sup>-1</sup>    | Estimated       |
| $M_{\text{total}a}$ | 0.1                             | -                    | Assumed         |
| $M_{\text{total}c}$ | 0.1                             | -                    | Assumed         |
| $KM_a$              | $0.4 \times M_{\text{total}a}$  | -                    | Estimated       |
| $KM_c$              | $0.02 \times M_{\text{total}c}$ | -                    | Estimated       |
| $KS_{p,a}$          | 0.5                             | g L <sup>-1</sup>    | Estimated       |
| $KS_{s,a}$          | 0.1                             | g L <sup>-1</sup>    | Estimated       |
| $KS_{p,c}$          | 0.5                             | g L <sup>-1</sup>    | Estimated       |
| $KS_{s,c}$          | 0.5                             | g L <sup>-1</sup>    | Estimated       |
| $Kd_{p,a}$          | 0.05                            | day <sup>-1</sup>    | Estimated       |
| $Kd_{s,a}$          | 0.05                            | day <sup>-1</sup>    | Estimated       |
| $Kd_{p,c}$          | 0.13                            | day <sup>-1</sup>    | Estimated       |
| $Kd_{s,c}$          | 0.14                            | day <sup>-1</sup>    | Estimated       |
| $m$                 | 2                               | -                    | [1]             |
| $i_0$               | 20                              | A m <sup>-2</sup>    | Estimated       |
| $A_c$               | 158                             | cm <sup>2</sup>      | Estimated       |
| $Y_a$               | 1                               | -                    | Assumed         |
| $Y_c$               | 1                               | -                    | Assumed         |
| $Mm_a = Mm_c$       | 663400                          | mg mol <sup>-1</sup> | [1]             |
| $R_{\min}$          | 1.1                             | $\Omega$             | Estimated       |
| $R_{\max}$          | 2000                            | $\Omega$             | Estimated       |
| $K_R$               | 0.002                           | L mg <sup>-1</sup>   | Estimated       |
| $E_c$               | 0.5                             | -                    | Assumed         |

|             |        |                                     |           |
|-------------|--------|-------------------------------------|-----------|
| $q_{p2}$    | 0.8    | day <sup>-1</sup>                   | Estimated |
| $V_a = V_c$ | 2      | L                                   | [2]       |
| $\beta_c$   | 0.5    | -                                   | Assumed   |
| $F$         | 96,485 | A s mol <sup>-1</sup>               | Constant  |
| $R$         | 8.314  | J K <sup>-1</sup> mol <sup>-1</sup> | Constant  |
| $T$         | 298.15 | K                                   | Assumed   |

---

## References

- [1] R.P. Pinto, B. Srinivasan, A. Escapa, and B. Tartakovsky. Multi-population model of a microbial electrolysis cell. *Environ. Sci. Technol.*, 45(11):5039–5046, 2011.
- [2] J Annie Modestra and S Venkata Mohan. Microbial electrosynthesis of carboxylic acids through co<sub>2</sub> reduction with selectively enriched biocatalyst: Microbial dynamics. *J. CO<sub>2</sub> Util.*, 20:190–199, 2017.
